# Supplementary material for: Gradual polyploid genome evolution revealed by pan-genomic analysis of Brachypodium hybridum and its diploid progenitors
Source: PubMed Central journal article supplement (PMC7391716; doi:10.1038/s41467-020-17302-5), 2020-07-29
Supplement: 41467_2020_17302_MOESM1_ESM.pdf [file 41467_2020_17302_MOESM1_ESM.pdf]

**Gradual polyploid genome evolution revealed by pan-genomic analysis of  
*Brachypodium hybridum* and its diploid progenitors**

---

Gordon *et. al.*

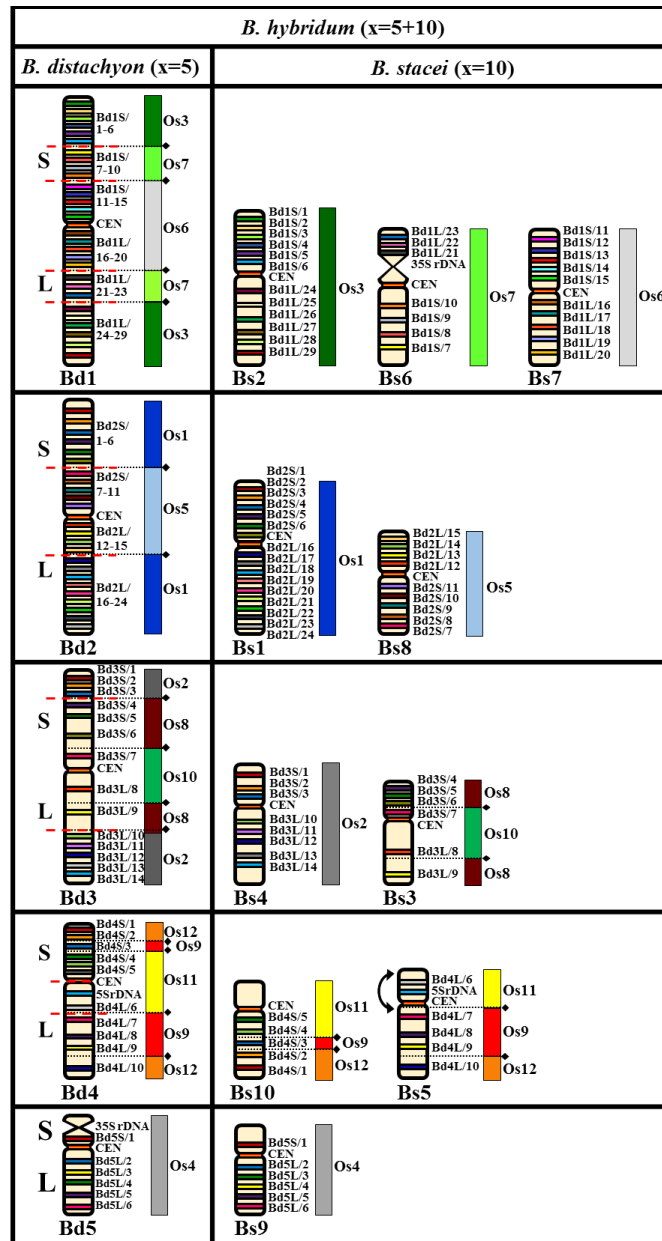

**Supplementary Figure 1.** Chromosomal distribution of the single-locus BAC clones that were derived from chromosomes Bd1-Bd5 of *B. distachyon* and mapped using fluorescence *in situ* hybridization-based comparative chromosome barcoding to the chromosomes of *B. stacei* and *B. hybridum*. The distribution of the clones on the chromosome diagram reflects their position on the physical map of the *B. distachyon* genome. Detailed lists of BAC clones used in the comparative cytomechanical analyses are shown in Supplementary table 1. The diagrams next to the *Brachypodium* chromosomes relate the BAC clones to the homeologous regions in different rice (Os) chromosome equivalents (intermediate ancestral grass chromosomes). Black diamonds and dotted lines indicate the hypothetical fusion points of the intermediate ancestral grass chromosomes in Bd1-Bd5. Red dashed lines indicate the chromosomal breakpoints that were found in the Bs-genome chromosomes in *B. stacei* and *B. hybridum*. Arrows point to the inversion that was present on chromosome Bs5 of these species.

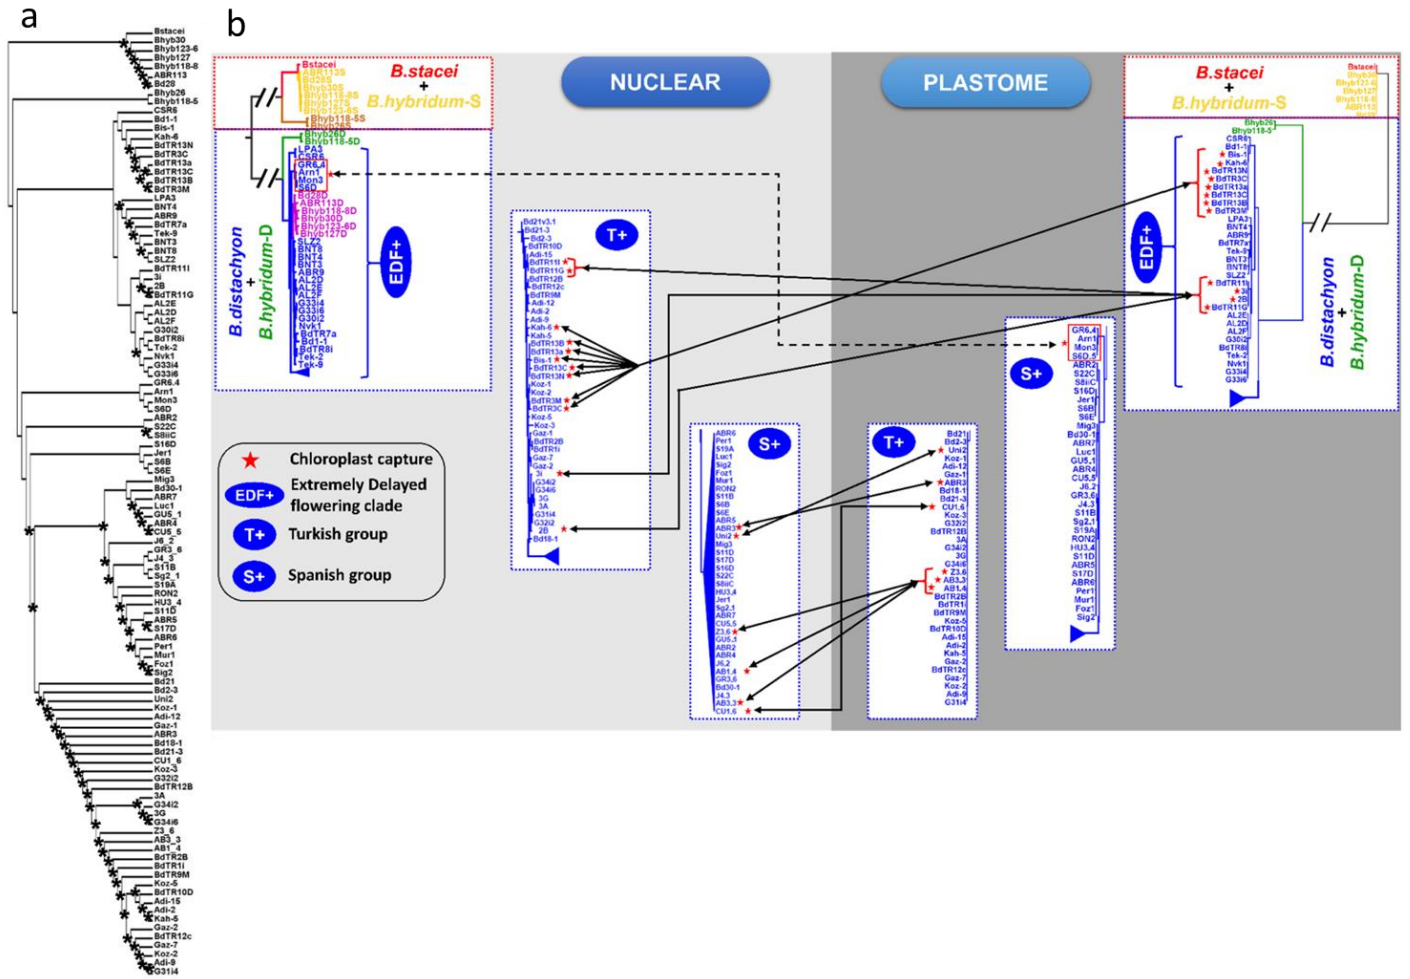

**Supplementary Figure 2.** Chloroplast capture. a) Cladogram of Maximum Likelihood *Brachypodium* phylogenomic tree based on plastomes constructed with IQTREE showing high ultrafast bootstrap branch support of main clades and groups (asterisks indicate branches with support < 95%). b) Comparative evolutionary nuclear and plastid analysis. Nuclear (left) vs plastome (right) trees. Stars and arrows indicate chloroplast capture events between the main *B. distachyon* groups. *B. stacei* (red), *B. hybridum* S-plastotypes plastomes and nuclear S subgenome (yellow), *B. hybridum* S-plastotypes nuclear D subgenome (purple), *B. hybridum* D-plastotypes plastomes and nuclear D subgenome (green), *B. hybridum* D-plastotypes nuclear S subgenome (brown), *B. distachyon* (blue).

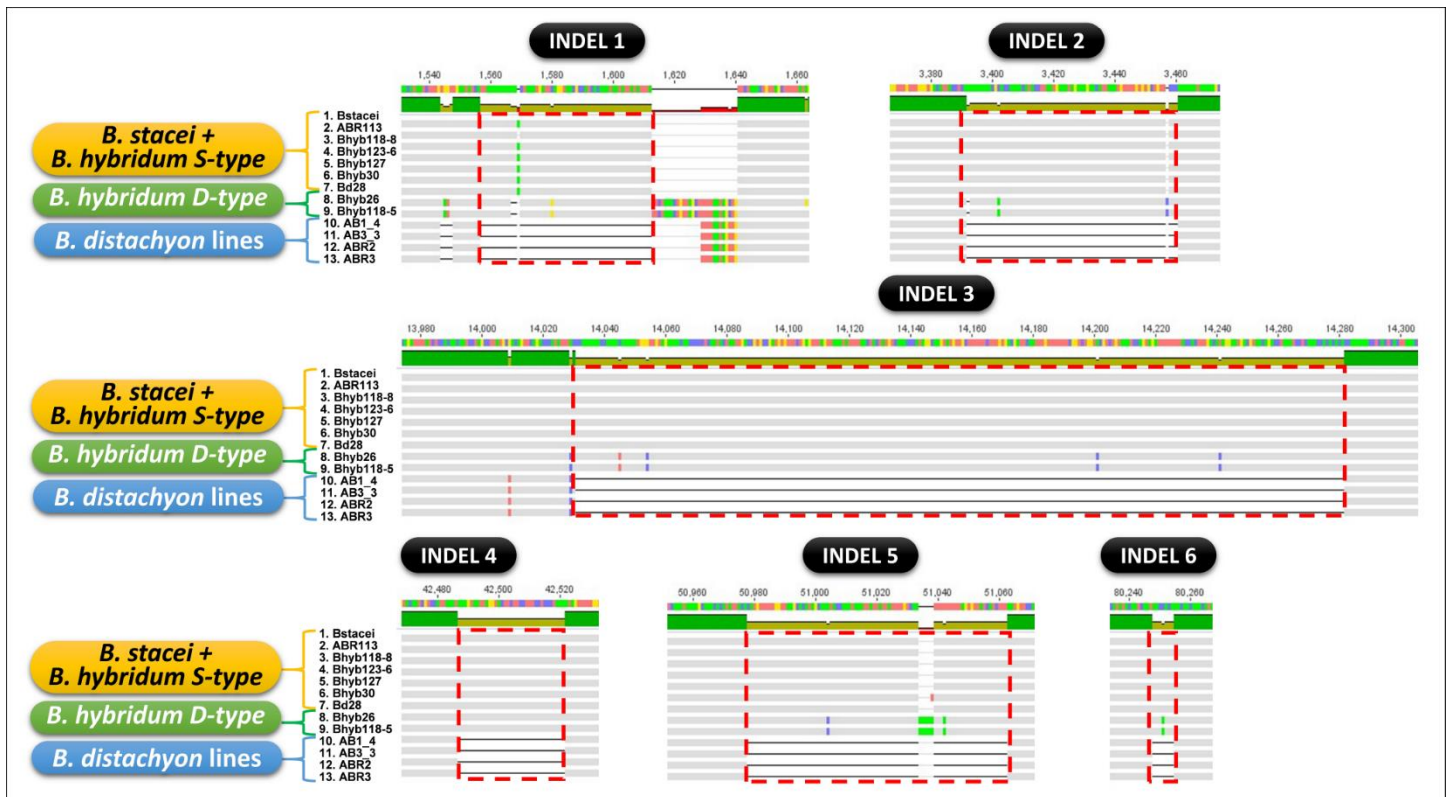

**Supplementary Figure 3.** Plastome insertions shared by *B. stacei* and all studied *B. hybridum* plastomes (D and S plastotypes). Indel 1: 56-68 bp (start position 1,557); Indel 2: 68 bp (3,392); Indel 3: 251 bp (14,031); Indel 4: 35 bp (42,487); Indel 5: 80-85 bp (50,978); Indel 6: 7 bp (80,248).

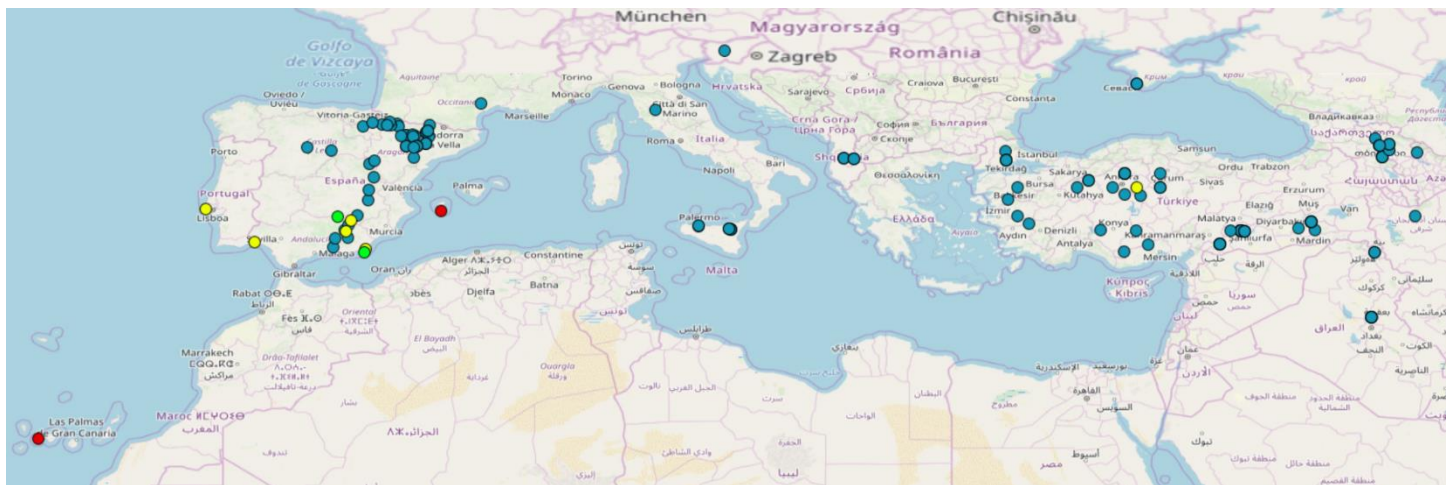

**Supplementary Figure 4.** Geographical origin of the lines used in this study. *B. distachyon* (120 lines, blue circles), *B. stacei* (2 lines, red circles), *B. hybridum* D-plastotype (2 lines, green circles), *B. hybridum* S-plastotype (6 lines, yellow circles). See Supplementary data 4 for coordinates used to make this figure. The invasive Australian *B. hybridum* B28 line (S-plastotype) is not shown in this map. Note that some lines overlap because they have the same or very close geographical coordinates.

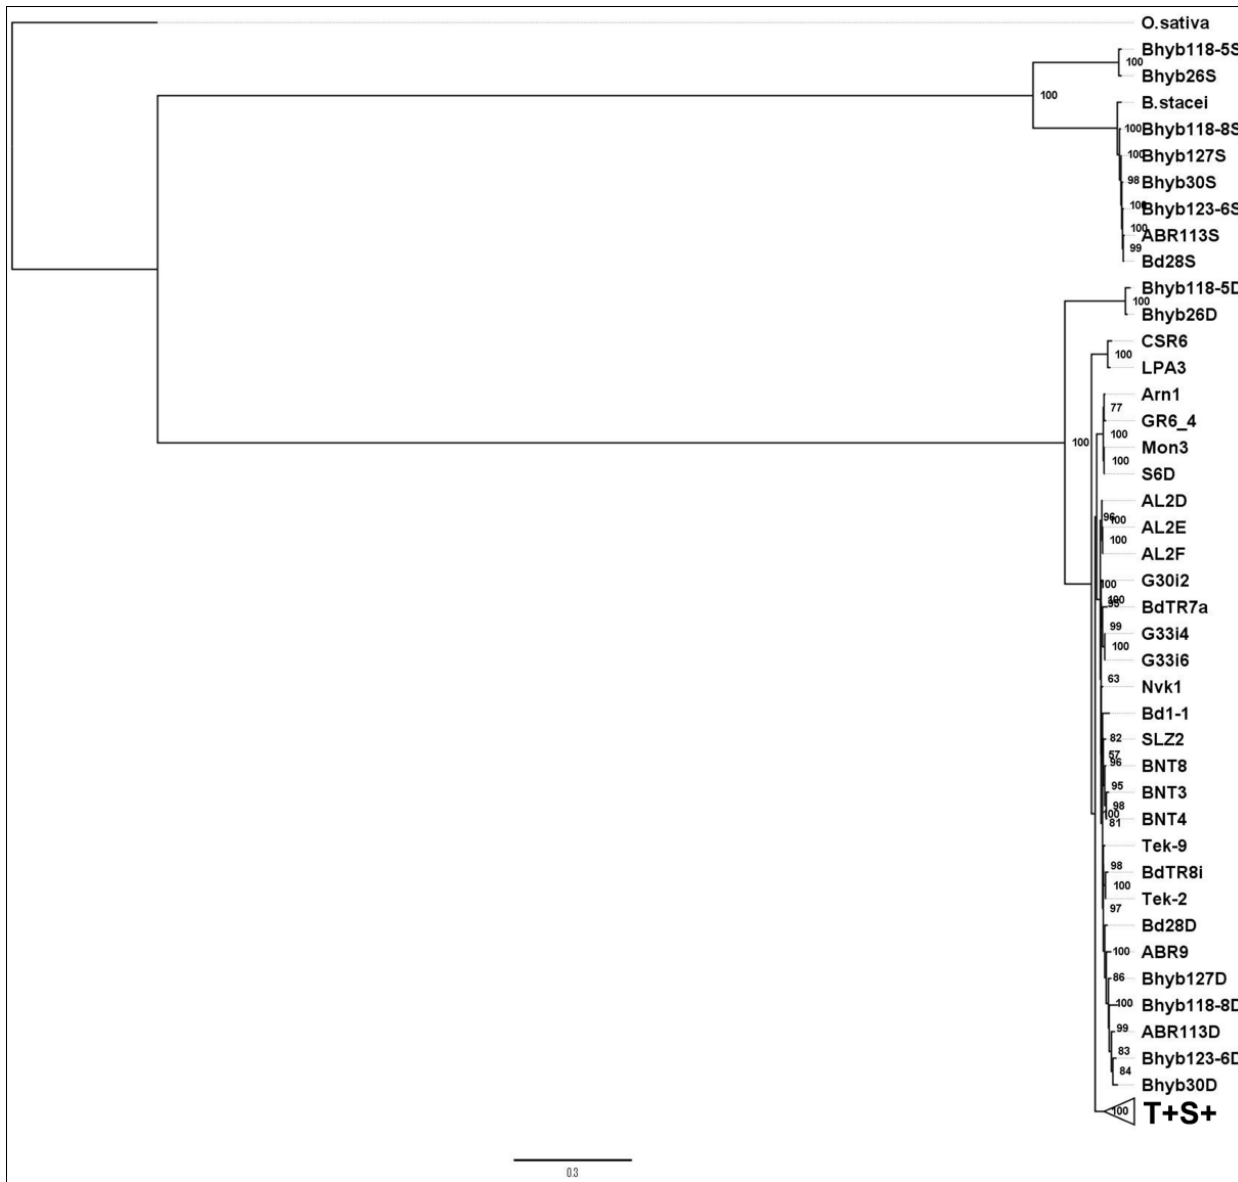

**Supplementary Figure 5.** Maximum likelihood phylogenomic tree of 116 *B. hybridum*, *B. distachyon* and *B. stacei* lines based on a reduced data matrix of 5,443 syntetically aligned nuclear SNVs that were also homologous to the 12 chromosomes of the outgroup *Oryza sativa*.

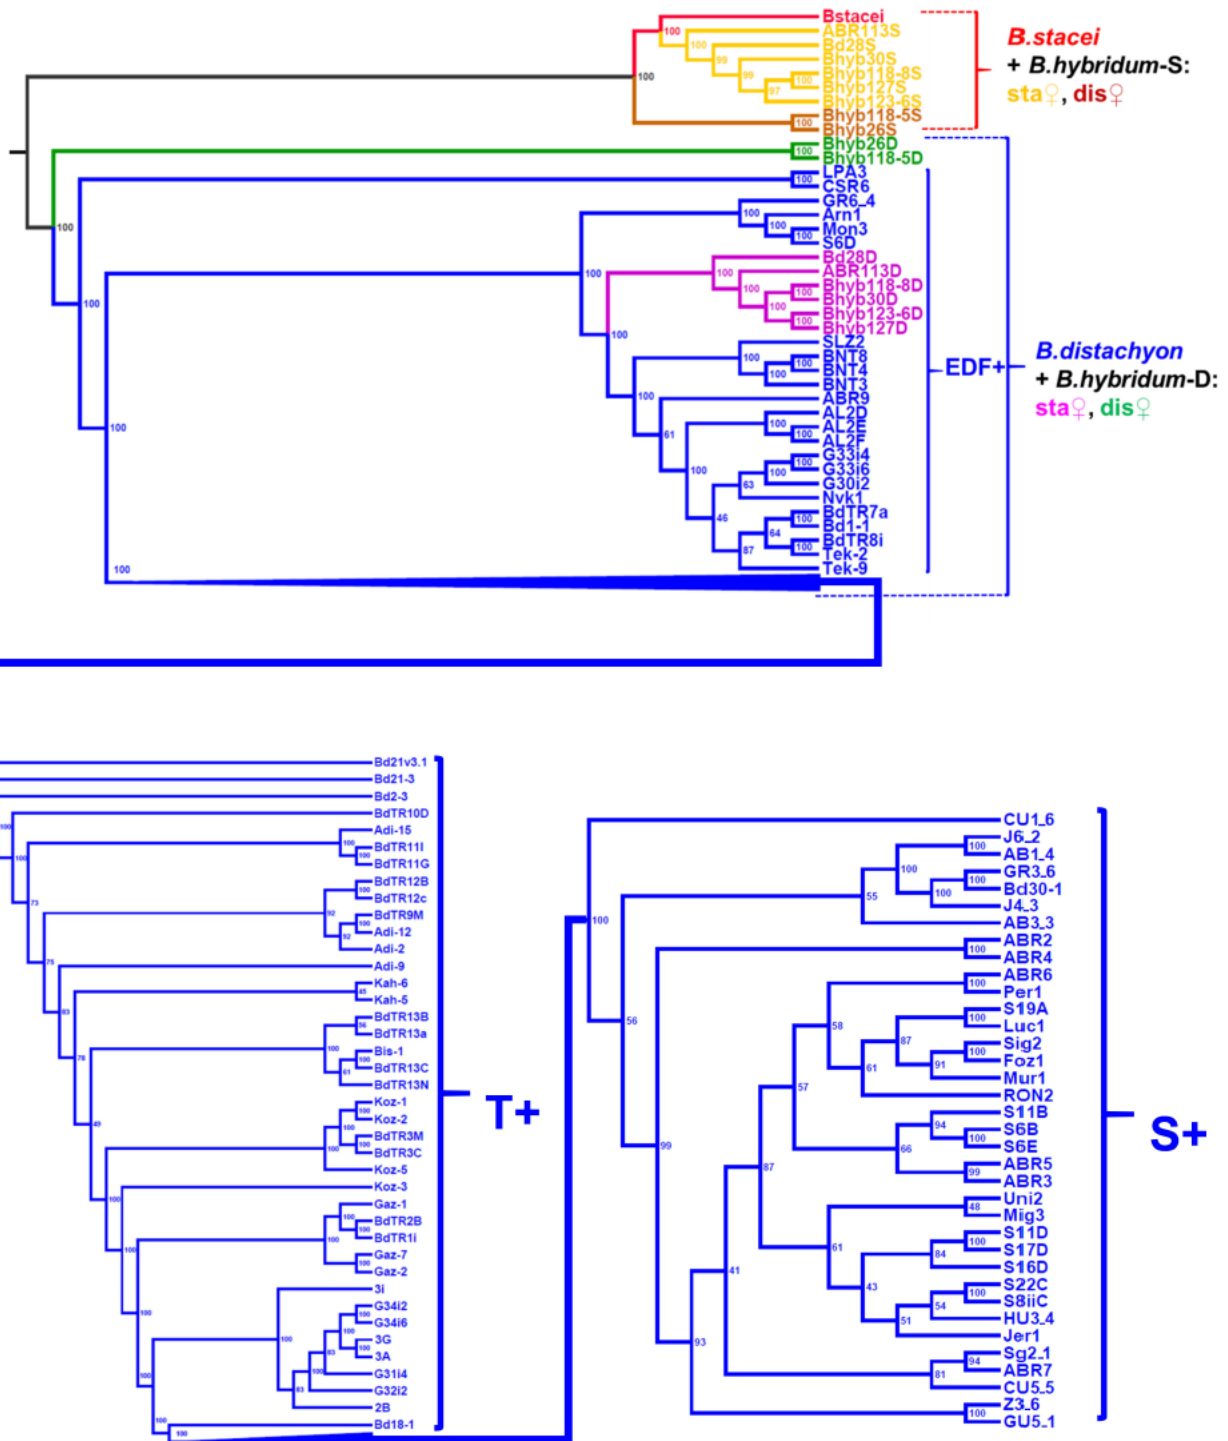

**Supplementary Figure 6.** Best Maximum Likelihood *Brachypodium* phylogenomic tree based on 745,858 syntenically aligned nuclear SNPs constructed with IQTREE. Cladogram showing branch support. *B. stacei* (red), *B. distachyon* (blue), *B. hybridum* D plastotypes S subgenome, brown; D subgenome, green), *B. hybridum* S plastotype (S subgenome, yellow; D subgenome, purple). This is the same tree as Fig. 4a, but all lines are legible and bootstrap support is indicated.

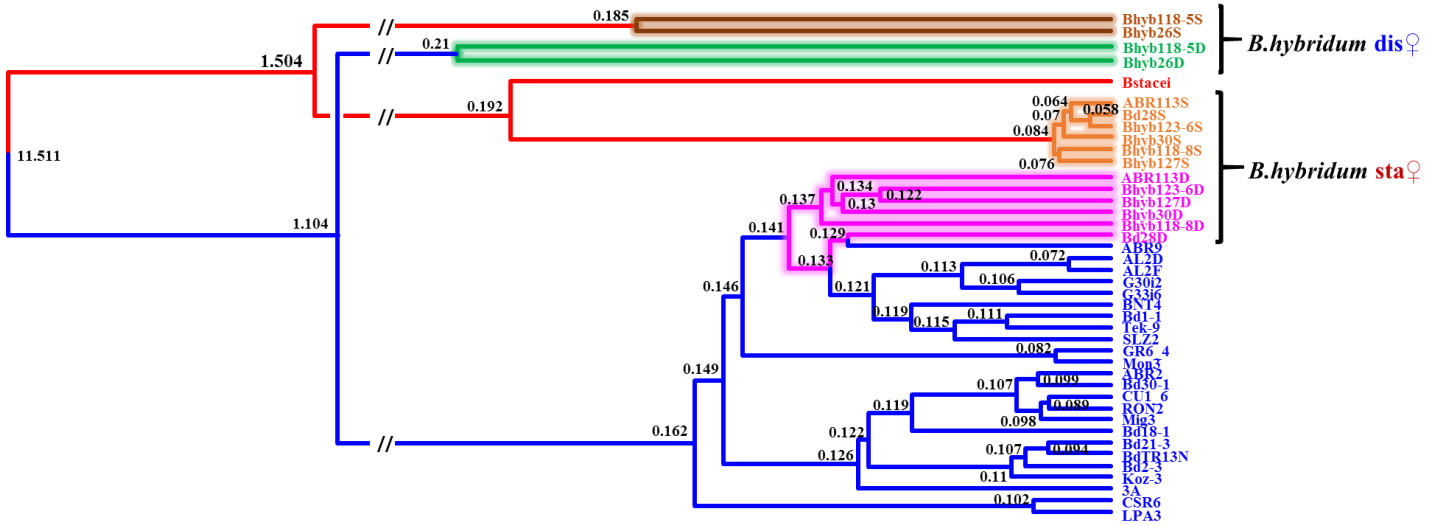

**Supplementary Figure 7.** Dated *Brachypodium* maximum clade credibility tree based on 4,942 nuclear SNVs constructed using the multi-species coalescence model with SNAPP. Estimated split times (million years ago) for the crown nodes and the successive diverging nodes of the *B. stacei* (red) and *B. distachyon* (blue) groups are indicated on branches. Subgenomic lineages of ancestral *B. hybridum* D plastotypes are shown in green (D subgenome) and brown (S subgenome) and those of the recent *B. hybridum* S plastotypes in purple (D subgenome) and orange (S subgenome).

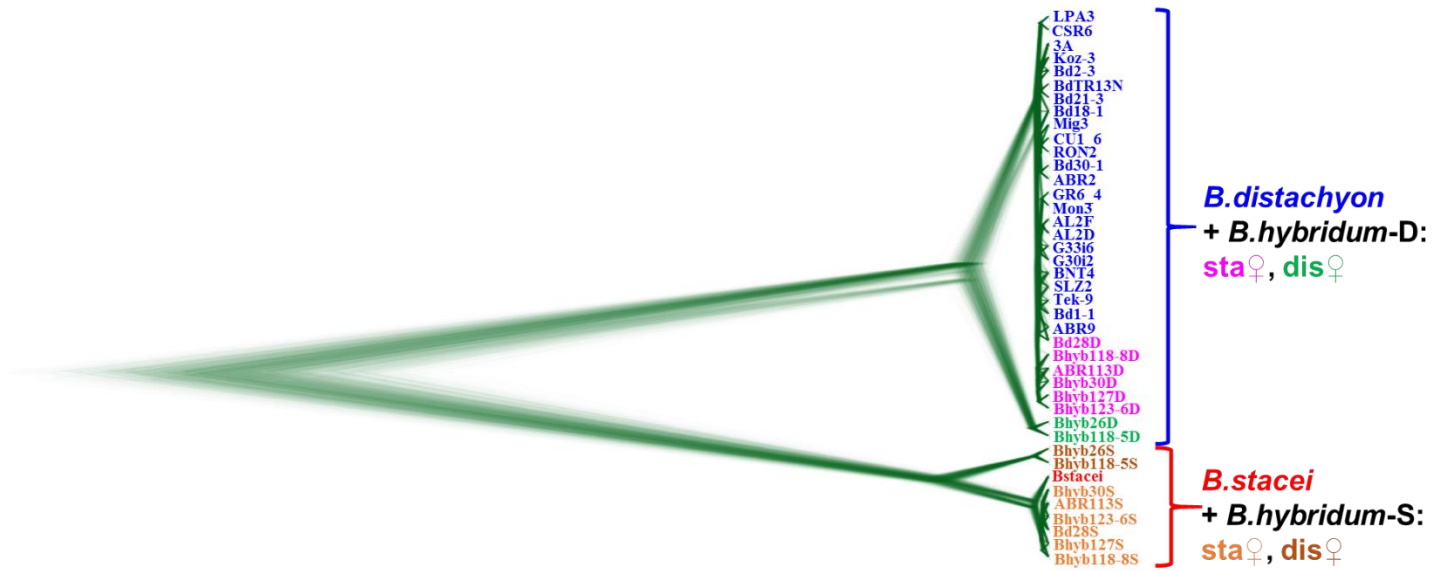

**Supplementary Figure 8.** Bayesian *Brachypodium* phylogenetic trees based on 4,942 nuclear SNVs constructed using the multi-species coalescence model with SNAPP. Density tree of 2,170 trees. *B. stacei* (red); *B. distachyon* (blue); *B. hybridum* D plastotypes: D subgenome (green), S subgenome (brown); *B. hybridum* S plastotypes: D subgenome (purple), S subgenome (orange).



a

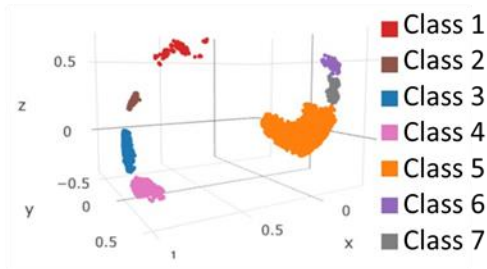

b

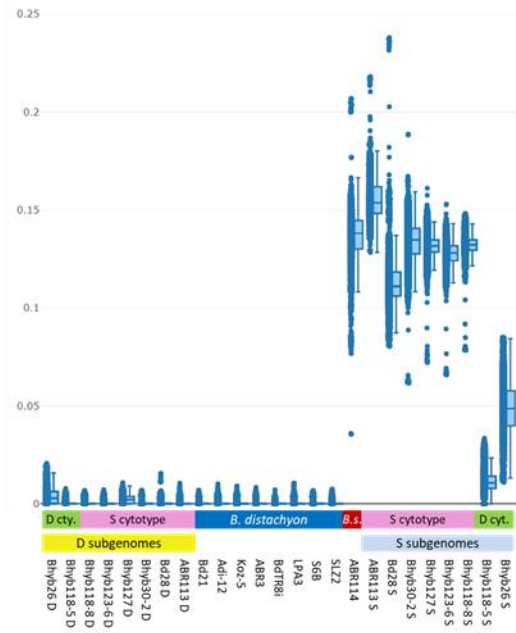

c

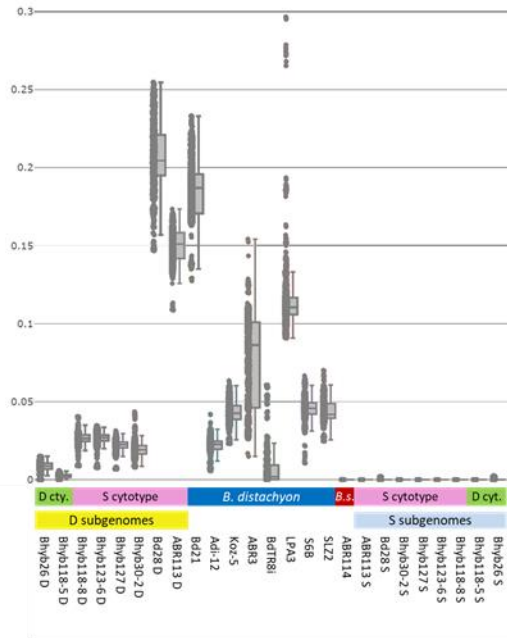

**Supplementary Figure 9.** K-mer abundance graphs for the classes not shown in Fig. 6. (a) Three-dimensional kernel PCA (cosine kernel) plot showing the seven distinct classes of k-mers identified by the algorithm. Class 3 (b) and Class 7 (c) on each genome are plotted for each k-mer class designated by color (see Fig. 6). The species/subgenome and plastotype are indicated below the x-axis; accession codes correspond to those indicated in Supplementary data 4. B.s.=*B. stacei*. Dots represent relative abundance of individual k-mers. Boxplots show the median and 25-75% range. Error bars are +/- 1 sd. Source data are provided as a Source Data file.

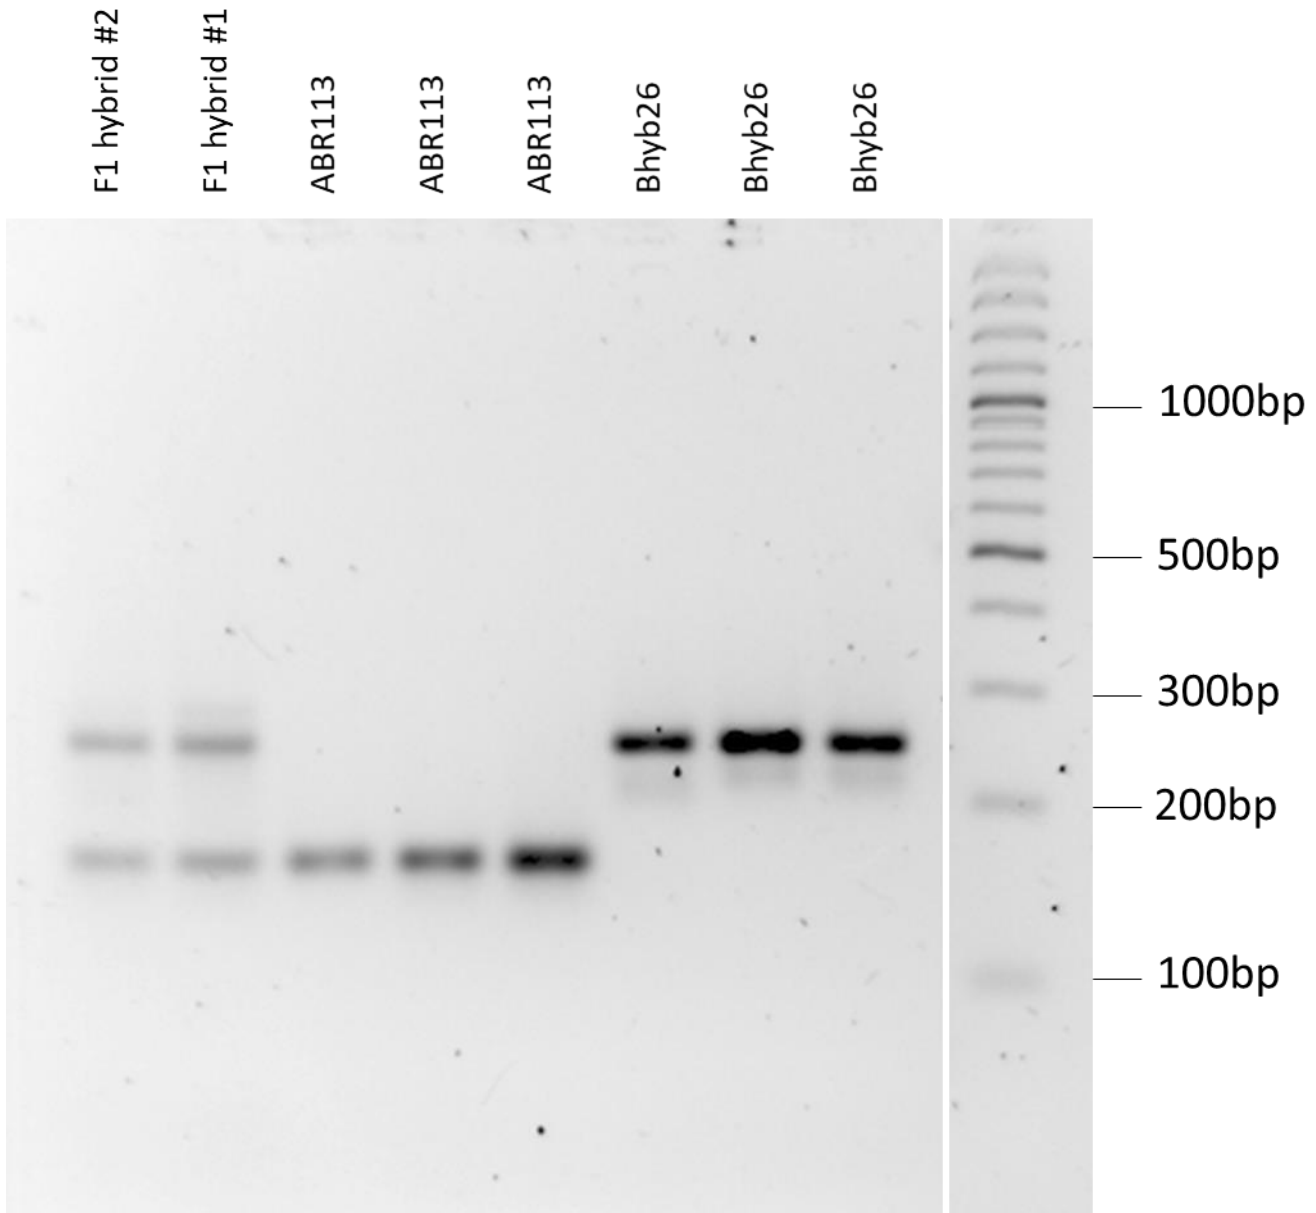

**Supplementary Figure 10.** PCR verification of F1 hybrids. Example of a genotyping gel for progeny of ABR113 x Bhyb26 crosses. A representative gel from one of 3 primer pairs from different locations throughout the genome, which reliably and unambiguously distinguished the *B. hybridum* ABR113 and Bhyb26 accessions, is shown. Note that the F1 hybrids contains both parental band sizes. Primer pair shown: 5-  
'CCTATGGCAATTTGGAGACG-3', 5'-CCTATTCTTCTGATCCAAGAGATCC-3'. Additional informative primer pairs: 5'-GAGTCCGGATAAGTGCAGCCC-3' and 5'-CTTGGGCAAACCACGACTGCT-3'; 5'-GTCTGGTCGTGCTCGCAATACGC-3' and 5'-GCGATGCATGTCATGTGAGTG-3'.

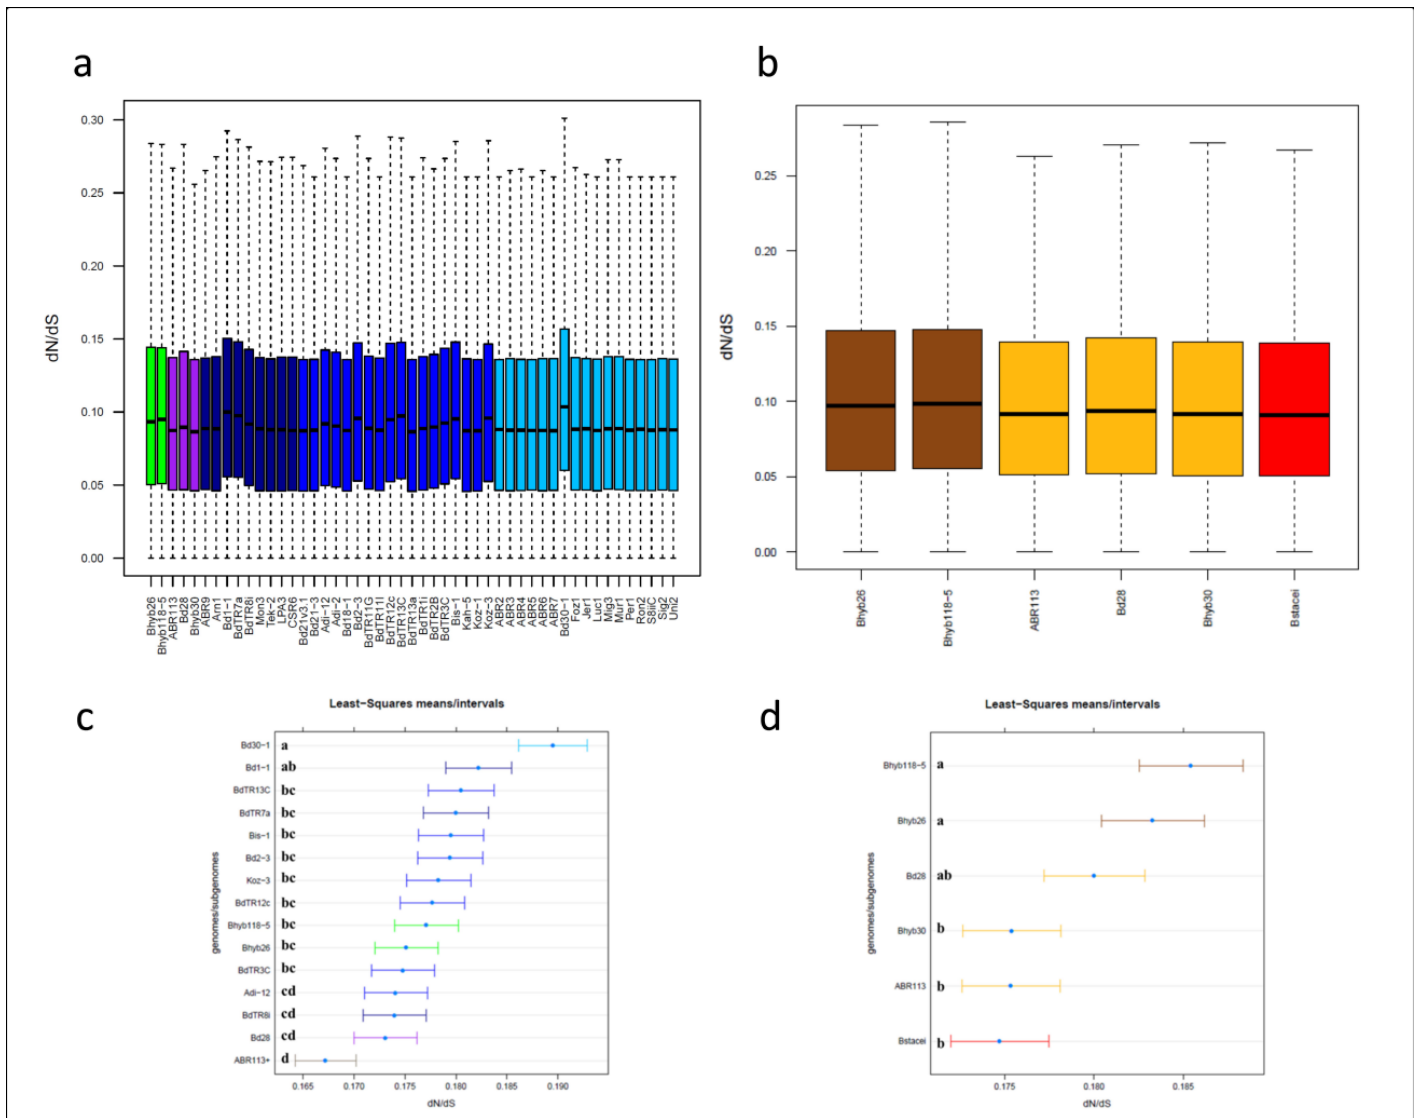

**Supplementary Figure 11.** Selection analysis. Distribution of dN/dS values of genes under negative selection pressure ( $dN/dS < 0.5$ ) in *B. distachyon* genomes and *B. hybridum* D subgenomes (a) and in *B. stacei* genome and *B. hybridum* S subgenomes (b) groups. Box plots depict the corresponding median, the first (25%) and the third (75%) quartiles and whisker plots depict 1.5 times the interquartile range. (c and d) Least-Squares means and confidence intervals ( $P < 0.05$ ) obtained through the Generalized Linear Model (GLM) of the R program for, respectively, the (a) and (b) groups. Equal letters indicate no significant differences among genomes. Note the less constrained dN/dS values for the two *B. hybridum* D plastotypes Bhyb26 and Bhyb118-5 and the S plastotype Bd28 genes as well as for 12 *B. distachyon* lines genes with respect to the rest. Source data are provided as a Source Data file.

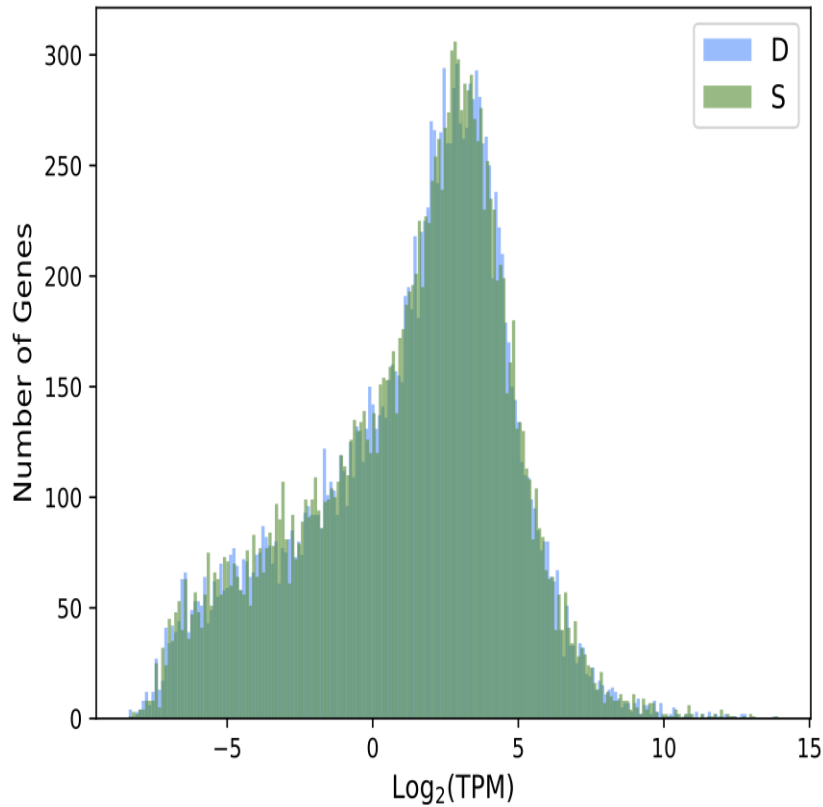

**Supplementary Figure 12.** Expression analysis. Normalized expression values for homeologous genes of the *B. hybridum* ABR113 subgenomes D (blue) and S (green) obtained by mapping to the entire reference genome. The similar distributions demonstrate a lack of obvious preferential subgenome expression. Non-expressed genes were included in statistical tests but removed from graph for visual clarity. Source data are provided as a Source Data file.

**Supplementary Table 1.** BAC clones used in the comparative cytomolecular analyses.

| <b>BAC name</b> | <b>BAC clone identifier*</b> | <b>Position in the genome (bp)</b> |
|-----------------|------------------------------|------------------------------------|
| CEN             | BD_CBa0033J12                | -                                  |
| Bd1S/1          | BD_CBa0027N17                | Bd1: 560624 : 710332               |
| Bd1S/2          | BD_ABa0004B12                | Bd1: 3276891 : 3460444             |
| Bd1S/3          | BD_ABa0017K22                | Bd1: 5375697 : 5509098             |
| Bd1S/4          | BD_CBa0030L10                | Bd1: 8680898 : 8845282             |
| Bd1S/5          | BD_ABa0032D10                | Bd1: 9006125 : 9148678             |
| Bd1S/6          | BD_ABa0027D04                | Bd1: 12706461 : 12847057           |
| Bd1S/7          | BD_ABa0020A04                | Bd1: 15092918 : 15238493           |
| Bd1S/8          | BD_ABa0009N18                | Bd1: 17150298 : 17335777           |
| Bd1S/9          | BD_CBa0002O16                | Bd1: 20013520 : 20160236           |
| Bd1S/10         | BD_CBa0022H13                | Bd1: 23114454 : 23242441           |
| Bd1S/11         | BD_ABa0018O15                | Bd1: 25727688 : 25878318           |
| Bd1S/12         | BD_ABa0044I06                | Bd1: 28135872 : 28292480           |
| Bd1S/13         | BD_ABa0036J15                | Bd1: 31222238 : 31387974           |
| Bd1S/14         | BD_CBa0024I19                | Bd1: 32507293 : 32633286           |
| Bd1S/15         | BD_ABa0004L01                | Bd1: 34316249 : 34466638           |
| Bd1L/16         | BD_ABa0002I22                | Bd1: 39952805 : 39424325           |
| Bd1L/17         | BD_CBa0004P09                | Bd1: 43536825 : 43670757           |
| Bd1L/18         | BD_CBa0025P22                | Bd1: 46564769 : 46692954           |
| Bd1L/19         | BD_CBa0044L08                | Bd1: 48612347 : 48783561           |
| Bd1L/20         | BD_ABa0003G14                | Bd1: 50139085 : 50274374           |
| Bd1L/21         | BD_CBa0035K24                | Bd1: 51720482 : 51914140           |
| Bd1L/22         | BD_ABa0046G17                | Bd1: 54082210 : 54253048           |
| Bd1L/23         | BD_CBa0028P17                | Bd1: 57093738 : 57225377           |
| Bd1L/24         | BD_ABa0010A14                | Bd1: 59503419 : 59676696           |
| Bd1L/25         | BD_ABa0013D23                | Bd1: 64120769 : 64297730           |
| Bd1L/26         | BD_ABa0043A05                | Bd1: 68898017 : 69053532           |
| Bd2S/1          | BD_ABa0038A01                | Bd2: 1022 : 132144                 |
| Bd2S/2          | BD_ABa0027K15                | Bd2: 1864643 : 2004976             |
| Bd2S/3          | BD_ABa0028O04                | Bd2: 3492740 : 3587755             |
| Bd2S/4          | BD_ABa0045F24                | Bd2: 6004397 : 6146555             |
| Bd2S/5          | BD_ABa0012B07                | Bd2: 9006125 : 9148678             |
| Bd2S/6          | BD_ABa0005E09                | Bd2: 10380990 : 10507985           |
| Bd2S/7          | BD_CBa0023P23                | Bd2: 10380990 : 10507985           |
| Bd2S/8          | BD_ABa0017D02                | Bd2: 15866689 : 16021967           |
| Bd2S/9          | BD_ABa0047D12                | Bd2: 17856422 : 17996794           |
| Bd2S/10         | BD_ABa0026K14                | Bd2: 19861012 : 20005795           |
| Bd2S/11         | BD_CBa0038L02                | Bd2: 22509927 : 22639901           |
| Bd2L/12         | BD_ABa0014K11                | Bd2: 34309867 : 34503922           |
| Bd2L/13         | BD_CBa0007E06                | Bd2: 36376507 : 36505573           |
| Bd2L/14         | BD_CBa0022I07                | Bd2: 38509106 : 38646001           |
| Bd2L/15         | BD_CBa0016E24                | Bd2: 39997753 : 40003453           |
| Bd2L/16         | BD_ABa0008H07                | Bd2: 42500887 : 42664133           |

| <b>BAC name</b> | <b>BAC clone identifier*</b> | <b>Position in the genome (bp)</b> |
|-----------------|------------------------------|------------------------------------|
| Bd2L/17         | BD_CBa0041G17                | Bd2: 44876290 : 45007631           |
| Bd2L/18         | BD_CBa0031I09                | Bd2: 46500135 : 46639653           |
| Bd2L/19         | BD_CBa0019P09                | Bd2: 48369110 : 48504229           |
| Bd2L/20         | BD_CBa0038L04                | Bd2: 50005019 : 50143082           |
| Bd2L/21         | BD_ABa0031O24                | Bd2: 52001822 : 52162247           |
| Bd2L/22         | BD_CBa0036G07                | Bd2: 53816466 : 54010118           |
| Bd2L/23         | BD_CBa0047O03                | Bd2: 55698147 : 56502216           |
| Bd2L/24         | BD_ABa0038G14                | Bd2: 57002804 : 57148130           |
| Bd3S/1          | BD_CBa0028O16                | Bd3: 856255 : 1007650              |
| Bd3S/2          | BD_ABa0015A18                | Bd3: 4001904 : 4157452             |
| Bd3S/3          | BD_ABa0018B12                | Bd3: 6003300 : 6153924             |
| Bd3S/4          | BD_ABa0030J22                | Bd3: 8504730 : 8651070             |
| Bd3S/5          | BD_CBa0016A22                | Bd3: 11505050 : 11712720           |
| Bd3S/6          | BD_ABa0022G01                | Bd3: 16038657 : 16055486           |
| Bd3S/7          | BD_ABa0033D16                | Bd3: 22106200 : 22299788           |
| Bd3L/8          | BD_CBa0011M04                | Bd3: 36854229 : 37002472           |
| Bd3L/9          | BD_ABa0038N13                | Bd3: 44001051 : 44142538           |
| Bd3L/10         | BD_ABa0026M18                | Bd3: 49347850 : 49503810           |
| Bd3L/11         | BD_ABa0037F15                | Bd3: 50854746 : 51004145           |
| Bd3L/12         | BD_ABa0037C10                | Bd3: 52501229 : 52687354           |
| Bd3L/13         | BD_ABa0008G22                | Bd3: 55503533 : 55665230           |
| Bd3L/14         | BD_ABa0020N10                | Bd3: 57504387 : 57653389           |
| Bd4S/1          | BD_CBa0030B12                | Bd4: 2007584 : 2157984             |
| Bd4S/2          | BD_CBa0040J03                | Bd4: 7830905 : 8001843             |
| Bd4S/3          | BD_CBa0021B09                | Bd4: 9502901 : 9667864             |
| Bd4S/4          | BD_ABa0043D11                | Bd4: 11006774 : 11150531           |
| Bd4S/5          | BD_ABa0010I18                | Bd4: 14002249 : 14164264           |
| Bd4L/6          | BD_ABa0006J17                | Bd4: 29358544 : 29516826           |
| Bd4L/7          | BD_ABa0020D08                | Bd4: 32504625 : 32642850           |
| Bd4L/8          | BD_CBa0035E05                | Bd4: 39350118 : 39526113           |
| Bd4L/9          | BD_CBa0038H23                | Bd4: 42789149 : 43003220           |
| Bd4L/10         | BD_ABa0041I03                | Bd4: 48350055 : 48507632           |
| Bd5S/1          | BD_ABa0019O20                | Bd5: 1091367 : 1236179             |
| Bd5L/2          | BD_ABa0045F23                | Bd5: 13499779 : 13653343           |
| Bd5L/3          | BD_ABa0023L21                | Bd5: 17634500 : 17679830           |
| Bd5L/4          | BD_CBa0024J19                | Bd5: 20845837 : 21003148           |
| Bd5L/5          | BD_CBa0032J06                | Bd5: 23870997 : 24003288           |
| Bd5L/6          | BD_ABa0019J13                | Bd5: 25906054: 26098440            |

\* More detail can be found in the NCBI database under the following URLs:

<http://www.ncbi.nlm.nih.gov/clone/library/genomic/424> (BD\_ABa library) and

<http://www.ncbi.nlm.nih.gov/clone/library/genomic/426/> (BD\_CBa library).

**Supplementary Table 2.** Correspondence between sequenced chromosomes and karyotype (in Lusinska *et al.*<sup>1</sup>).

| <i>B. distachyon</i>    | <i>B. stacei</i><br>(assignment based on<br>sequencing data) | <i>B. stacei</i><br>(assignment based on<br>cytogenetic criteria <sup>1</sup> ) | Ancestral grass<br>equivalents |
|-------------------------|--------------------------------------------------------------|---------------------------------------------------------------------------------|--------------------------------|
| Bd1 (external part)     | Bs2                                                          | Bs3                                                                             | Os3                            |
| Bd1 (interstitial part) | Bs6 (35S rDNA)                                               | Bs10 (35S rDNA)                                                                 | Os7                            |
| Bd1 (central part)      | Bs7                                                          | Bs2 or Bs8                                                                      | Os6                            |
| Bd2 (external part)     | Bs1                                                          | Bs1                                                                             | Os1                            |
| Bd2 (central part)      | Bs8                                                          | Bs7                                                                             | Os5                            |
| Bd3 (external part)     | Bs4                                                          | Bs4                                                                             | Os2                            |
| Bd3 (central part)      | Bs3                                                          | Bs6                                                                             | Os8, Os10                      |
| Bd4 (short arm)         | Bs10                                                         | Bs9                                                                             | Os12, Os9, Os11                |
| Bd4 (long arm)          | Bs5                                                          | Bs5                                                                             | Os12, Os9, Os11                |
| Bd5 (35S rDNA)          | Bs9                                                          | Bs2 or Bs8                                                                      | Os4                            |

## Supplementary Note 1

Multiple lines of evidence (phylogenetic trees, structure analysis, k-mers) suggest that the *B. hybridum* D and S plastotypes are reproductively isolated. To experimentally test their compatibility, we conducted controlled crosses between the S plastotype line ABR113 as the female parent and the D plastotype line Bhyb26 as the male parent. We successfully created two F1 hybrids that were verified by PCR markers (Supplementary fig. 10). However, both F1 plants failed to set seed from approximately 500 flowers indicating that they are sterile. We also made the reciprocal cross, Bhyb26 as the female parent and ABR113 as the male parent, but this cross failed to produce any viable seed from 29 attempts. By contrast, crosses between S plastotype lines ABR113 and BdTR6g were successfully used to create our mapping population. Thus, infertility between D and S plastotypes likely explains the reproductive isolation of the D and S plastotype lines and the distinct genomic signatures of the D plastotype line Bhyb118-5 and the S plastotype line Bhyb118-8 that were collected at the same location.

## Supplementary Note 2

Analysis of 19,805 1:1 high-confidence homeologous gene pairs with a paired t-test indicated that average log-transformed gene expression was not systematically different between the two subgenomes ( $p=0.40$ ). To examine HEB on a per-gene basis, we used a likelihood ratio test implemented in DESeq2<sup>2</sup>, explicitly accounting for gene length and variation between libraries. In both leaves and spikes, roughly half of all testable homeolog pairs showed HEB (50% and 46%, respectively). Of the nearly 4,000 genes that were consistently biased in the same direction in all experiments, 1,938 and 1,949 genes were biased toward the S or D homeolog, respectively. Given the extreme subtlety of these differences, we cannot conclude that gene expression in *B. hybridum* is globally biased towards one subgenome. This situation is similar to that observed in a large wheat transcriptional study that did not find evidence for a single subgenome dominating overall gene expression<sup>3</sup>. However, they did find that single subgenomes could dominate expression for genes involved in individual traits like seed development or defense<sup>3</sup>.



## Supplementary References

1. Lusinska J, Majka J, Betekhtin A, Susek K, Wolny E, Hasterok R. Chromosome identification and reconstruction of evolutionary rearrangements in *Brachypodium distachyon*, *B. stacei* and *B. hybridum*. *Annals of Botany* **122**, 445-459 (2018).
2. Love MI, Huber W, Anders S. Moderated estimation of fold change and dispersion for RNA-seq data with DESeq2. *Genome Biology* **15**, (2014).
3. Ramírez-González RH, *et al.* The transcriptional landscape of polyploid wheat. *Science* **361**, eaar6089 (2018).
